# Supplementary material for: How social exclusion modulates social information processing: A behavioural dissociation between facial expressions and gaze direction
Source: PLoS One. 2018 Apr 4;13(4):e0195100. doi: 10.1371/journal.pone.0195100 (PMC5884539; doi:10.1371/journal.pone.0195100)
Supplement: S6 Table — (XLSX) [file pone.0195100.s006.xlsx]

## Sheet: Foglio1
Random effect	Explained variance	Std Dev
Intercept | Subject	0.4598	0.678
